# Supplementary material for: Body Composition Assessment by Air-Displacement Plethysmography Compared to Dual-Energy X-ray Absorptiometry in Full-Term and Preterm Aged Three to Five Years
Source: MDPI journal article supplement (doi:10.3390/jcm11061604), 2022-03-14
Supplement: s1 [file s1]

**Supplemental Table S1.** Body composition parameters assessed by ADP and DXA between age 3-5 years.

|                 | 3 years      |              |                 | 4 years      |              | 5 years      |                  |
|-----------------|--------------|--------------|-----------------|--------------|--------------|--------------|------------------|
|                 | Full-term    | Very preterm | <i>p</i> -value | Full-term    | Full-term    | Very preterm | <i>p</i> -value  |
| <b>FM (kg)</b>  |              |              |                 |              |              |              |                  |
| DXA             | 4.86 (1.20)  | 3.92 (0.79)  | <b>0.001</b>    | 5.10 (1.21)  | 5.35 (1.30)  | 4.70 (1.39)  | <b>0.009</b>     |
| ADP default     | 3.67 (1.47)  | 3.34 (1.04)  | 0.344           | 4.16 (1.39)  | 4.24 (1.46)  | 2.12 (1.31)  | <b>&lt;0.001</b> |
| ADP revised     | 4.04 (1.46)  | 3.71 (1.03)  | 0.341           | 4.59 (1.42)  | 4.64 (1.32)  | 2.60 (1.39)  | <b>&lt;0.001</b> |
| <b>FM%</b>      |              |              |                 |              |              |              |                  |
| DXA             | 30.30 (4.76) | 26.06 (4.01) | <b>0.001</b>    | 28.70 (4.86) | 26.98 (4.60) | 23.52 (4.93) | <b>&lt;0.001</b> |
| ADP default     | 23.06 (7.65) | 22.30 (5.69) | 0.677           | 23.50 (6.66) | 21.52 (6.65) | 10.58 (5.52) | <b>&lt;0.001</b> |
| ADP revised     | 25.53 (8.37) | 25.05 (6.86) | 0.815           | 26.01 (7.41) | 22.87 (7.78) | 10.96 (5.93) | <b>&lt;0.001</b> |
| <b>FFM (kg)</b> |              |              |                 |              |              |              |                  |
| DXA             | 11.07 (1.15) | 11.11 (1.48) | 0.893           | 12.56 (1.51) | 14.35 (1.68) | 15.08 (1.19) | <b>0.028</b>     |
| ADP default     | 12.00 (1.32) | 11.52 (1.36) | 0.169           | 13.35 (1.67) | 15.31 (2.05) | 17.36 (2.10) | <b>&lt;0.001</b> |
| ADP revised     | 11.63 (1.27) | 11.15 (1.34) | 0.157           | 12.92 (1.61) | 14.73 (1.99) | 16.88 (2.02) | <b>&lt;0.001</b> |

Data are expressed as mean (SD). P-value term vs preterm is difference between mean difference in term and very preterm born children. Abbreviations: ADP, air-displacement plethysmography; DXA, dual energy X-ray absorptiometry; FM, fat mass; FM% = fat mass percentage; FFM, fat-free mass; LoA, limits of agreement (95% confidence interval).
